# Supplementary material for: Essential Oil Composition Analysis of Cymbopogon Species from Eastern Nepal by GC-MS and Chiral GC-MS, and Antimicrobial Activity of Some Major Compounds
Source: MDPI journal article supplement (doi:10.3390/molecules28020543), 2023-01-05
Supplement: s1 [file s1]

**Table S1: Chemical composition of *Cymbopogon winterianus* essential oils extracted from different parts**

| <b>RI<sub>calc</sub></b> | <b>RI<sub>db</sub></b> | <b>Compounds</b>                       | <b>Root</b> | <b>Root hair &amp; stalk</b> | <b>Leaves</b> | <b>Root stalk &amp; shoot</b> |
|--------------------------|------------------------|----------------------------------------|-------------|------------------------------|---------------|-------------------------------|
| 850                      | 848                    | (3Z)-Hexenol                           | -           | -                            | t             | -                             |
| 865                      | 867                    | 4-Heptanone                            | -           | -                            | t             | -                             |
| 921                      | 921                    | Tricyclene                             | -           | t                            | -             | -                             |
| 932                      | 931                    | $\alpha$ -Pinene                       | -           | t                            | -             | t                             |
| 946                      | 948                    | Camphene                               | t           | t                            | -             | t                             |
| 952                      | 954                    | Benzaldehyde                           | t           | t                            | -             | -                             |
| 969                      | 967                    | Sabinene                               | -           | t                            | -             | -                             |
| 981                      | 982                    | 6-Methyl-5-hepten-2-one                | t           | 0.1                          | 0.2           | 0.8                           |
| 988                      | 987                    | Myrcene                                | -           | t                            | t             | t                             |
| 988                      | 988                    | Dehydro-1,8-cineole                    | -           | -                            | t             | t                             |
| 990                      | 991                    | 6-Methyl-5-hepten-2-ol                 | -           | t                            | -             | t                             |
| 991                      | 996                    | <i>trans</i> -Dehydroxy linalool oxide | -           | -                            | -             | t                             |
| 998                      | 1002                   | n-Octanal                              | -           | t                            | -             | 0.1                           |
| 1024                     | 1027                   | Limonene                               | -           | t                            | t             | t                             |
| 1025                     | 1029                   | beta-Phellandrene                      | -           | t                            | -             | -                             |
| 1028                     | 1031                   | <i>o</i> -Menthan-8-ol                 | t           | -                            | t             | -                             |
| 1030                     | 1032                   | <i>p</i> -Menthan-8-ol                 | t           | 0.1                          | 0.1           | -                             |
| 1032                     | 1033                   | (Z)- $\beta$ -Ocimene                  | -           | t                            | 0.2           | 0.3                           |
| 1044                     | 1044                   | (E)- $\beta$ -Ocimene                  | -           | t                            | 0.2           | 0.2                           |
| 1051                     | 1051                   | Bergamal                               | t           | t                            | 0.1           | -                             |
| 1068                     | 1069                   | 4-Nonanone                             | t           | 0.4                          | 0.6           | 0.4                           |
| 1084                     | 1084                   | Camphenilone                           | -           | t                            | -             | -                             |
| 1086                     | 1088                   | Terpinolene                            | -           | t                            | -             | -                             |
| 1089                     | 1089                   | 4-Nonanol                              | t           | t                            | t             | -                             |
| 1090                     | 1092                   | Rosefuran                              | -           | t                            | t             | t                             |
| 1095                     | 1098                   | Linalool                               | 0.1         | 0.5                          | 0.5           | 0.8                           |
| 1099                     | 1104                   | $\alpha$ -Pinene oxide                 | -           | -                            | 0.1           | t                             |
| 1106                     | 1106                   | <i>cis</i> -Rose oxide                 | -           | t                            | t             | -                             |
| 1108                     | 1108                   | $\alpha$ -Cyclocitral                  | -           | -                            | -             | t                             |
| 1118                     | 1122                   | Fenchol                                | -           | -                            | t             | -                             |
| 1123                     | 1123                   | <i>cis-p</i> -Menth-2-en-1-ol          | t           | t                            | -             | -                             |
| 1126                     | 1126                   | $\beta$ -Methyl cyclohexanethanol      | t           | t                            | t             | -                             |
| 1128                     | 1127                   | <i>allo</i> -Ocimene                   | -           | -                            | -             | t                             |
| 1137                     | 1136                   | <i>epi</i> -Photocitral A              | -           | -                            | t             | -                             |
| 1136                     | 1141                   | <i>trans-p</i> -Menth-2-en-1-ol        | -           | t                            | -             | -                             |
| 1140                     | 1142                   | <i>exo</i> -Isocitral                  | -           | t                            | t             | 0.1                           |
| 1141                     | 1144                   | Verbenol                               | -           | t                            | -             | -                             |
| 1145                     | 1145                   | Isopulegol                             | 0.2         | 0.3                          | -             | -                             |
| 1145                     | 1147                   | <i>p</i> -Menth-3-en-8-ol              | t           | -                            | -             | -                             |
| 1147                     | 1148                   | <i>trans</i> -Chrysanthanal            | -           | -                            | 0.3           | -                             |

|      |      |                                                   |     |      |      |      |
|------|------|---------------------------------------------------|-----|------|------|------|
| 1148 | 1151 | Citronellal                                       | 1.1 | 8.6  | 13.7 | 0.3  |
| 1153 | 1154 | <i>trans</i> - $\beta$ -Terpineol                 | t   | t    | -    | -    |
| 1155 | 1157 | <i>iso</i> -Isopulegol                            | 0.1 | 0.1  | t    | -    |
| 1160 | 1160 | <i>cis</i> -Chrysanthenol                         | t   | t    | 0.2  | 0.2  |
| 1160 | 1162 | <i>iso</i> -borneol                               | t   | t    | -    | -    |
| 1160 | 1164 | <i>cis</i> -Dihydro- $\alpha$ -terpineol          | -   | t    | -    | -    |
| 1165 | 1166 | <i>exo</i> -Acetoxy camphene                      | t   | t    | -    | -    |
| 1167 | 1170 | Borneol                                           | 0.3 | 0.7  | -    | t    |
| 1165 | 1168 | Rosefuran epoxide                                 | -   | 0.1  | t    | 0.1  |
| 1174 | 1179 | Terpinen-4-ol                                     | t   | t    | -    | -    |
| 1177 | 1178 | <i>trans</i> -Isocitral                           | -   | 0.1  | 0.3  | 0.4  |
| 1179 | 1186 | <i>p</i> -Cymen-8-ol                              | -   | t    | -    | -    |
| 1193 | 1193 | (4Z)-Decenal                                      | -   | -    | t    | -    |
| 1199 | 1195 | $\alpha$ -Terpineol                               | 0.2 | 0.5  | t    | t    |
| 1201 | 1206 | Decanal                                           | t   | t    | t    | 0.2  |
| 1207 | 1208 | <i>trans</i> -Piperitol                           | -   | t    | -    | -    |
| 1216 | 1216 | <i>trans</i> -Isopiperitenol                      | -   | -    | -    | t    |
| 1218 | 1219 | Epoxy neral                                       | -   | t    | t    | t    |
| 1223 | 1222 | Citronellol                                       | t   | t    | 0.2  | t    |
| 1227 | 1223 | Nerol                                             | 4.3 | 7.5  | 5.1  | 0.2  |
| 1232 | 1230 | Epoxy geranial                                    | -   | t    | 0.1  | 0.1  |
| 1235 | 1238 | Neral                                             | 1.2 | 6.5  | 8.3  | 31.5 |
| 1249 | 1250 | Geraniol                                          | 0.1 | 8.6  | 37.1 | 0.4  |
| 1249 | 1253 | Piperitone                                        | -   | -    | -    | t    |
| 1264 | 1268 | Geranial                                          | 1.9 | 10.7 | 11.0 | 59.0 |
| 1270 | 1271 | 4-Undecanone                                      | t   | 0.1  | t    | -    |
| 1271 | 1275 | <i>trans</i> -Chrysanthenyl acetate               | -   | t    | -    | -    |
| 1273 | 1280 | <i>trans</i> -Carvone oxide                       | -   | 0.1  | t    | 0.2  |
| 1287 | 1282 | Bornyl acetate                                    | t   | t    | -    | -    |
| 1290 | 1292 | Dehydrobornyl acetate                             | -   | t    | -    | -    |
| 1298 | 1296 | Geranyl formate                                   | -   | t    | t    | -    |
| 1309 | 1308 | <i>p</i> -Vinyl guaiacol                          | t   | -    | -    | -    |
| 1309 | 1312 | Methyl geranate                                   | -   | -    | -    | t    |
| 1311 | 1313 | Carvenolide                                       | t   | 0.1  | 0.1  | -    |
| 1312 | 1316 | Citronellic acid                                  | 0.1 | 0.1  | t    | -    |
| 1324 | 1327 | Myrtenyl acetate                                  | -   | t    | -    | -    |
| 1335 | 1333 | $\delta$ -Elemene                                 | t   | -    | -    | -    |
| 1337 | 1338 | Citridiol A                                       | -   | t    | -    | -    |
| 1350 | 1347 | Citronellyl acetate                               | t   | 1.9  | 1.9  | -    |
| 1356 | 1350 | Eugenol                                           | 0.7 | 1.2  | 1.0  | -    |
| 1358 | 1353 | Neric acid                                        | t   | -    | -    | 0.4  |
| 1359 | 1356 | Neryl acetate                                     | -   | t    | t    | -    |
| 1359 | 1358 | 9-Decenoic acid                                   | t   | -    | -    | -    |
| 1360 | 1360 | (5 <i>E</i> )-2,4,4,7-Tetramethylocta-5,7-dien-3- | -   | -    | -    | 0.1  |

|      |      |                                      |      |      |      |     |
|------|------|--------------------------------------|------|------|------|-----|
|      |      | ol                                   |      |      |      |     |
| 1373 | 1367 | $\alpha$ -Ylangene                   | t    | t    | t    | -   |
| 1375 | 1369 | Decanoic acid                        | t    | t    | -    | -   |
| 1374 | 1373 | $\alpha$ -Copaene                    | t    | -    | -    | -   |
| 1379 | 1376 | Geranyl acetate                      | 0.1  | 5.3  | 11.3 | 0.3 |
| 1382 | 1380 | <i>cis</i> - $\beta$ -Elemene        | 0.1  | 0.1  | t    | -   |
| 1387 | 1381 | $\beta$ -Bourbonene                  | -    | -    | t    | -   |
| 1389 | 1387 | <i>trans</i> - $\beta$ -Elemene      | 2.1  | 0.9  | 0.3  | t   |
| 1393 | 1393 | Vanillin                             | -    | t    | -    | -   |
| 1406 | 1401 | ( <i>Z</i> )-Isoeugenol              | t    | t    | t    | -   |
| 1408 | 1408 | Dodecanal                            | t    | t    | -    | t   |
| 1417 | 1417 | ( <i>E</i> )- $\beta$ -Caryophyllene | 0.3  | 0.6  | 2.0  | 0.2 |
| 1434 | 1427 | $\gamma$ -Elemene                    | t    | t    | t    | -   |
| 1441 | 1432 | $\beta$ -Cedrane                     | t    | -    | -    | -   |
| 1442 | 1438 | 6,9-Guaiadiene                       | t    | t    | -    | -   |
| 1448 | 1441 | <i>cis</i> -Muurolo-3,5-diene        | t    | -    | -    | -   |
| 1448 | 1444 | ( <i>E</i> )-Isoeugenol              | 0.1  | 0.3  | 0.5  | 0.9 |
| 1452 | 1453 | $\alpha$ -Humulene                   | t    | 0.1  | 0.3  | t   |
| 1461 | 1459 | <i>cis</i> -Cadina-1(6),4-diene      | t    | -    | -    | -   |
| 1465 | 1463 | <i>cis</i> -Muurolo-4(14),5-diene    | -    | t    | t    | -   |
| 1475 | 1471 | Selina-4,11-diene                    | t    | t    | -    | -   |
| 1475 | 1472 | <i>trans</i> -Cadina-1(6),4-diene    | t    | t    | -    | -   |
| 1483 | 1479 | $\alpha$ -Amorphene                  | -    | t    | -    | -   |
| 1484 | 1480 | Germacrene D                         | 0.7  | 0.4  | 0.4  | t   |
| 1484 | 1485 | $\delta$ -Selinene                   | -    | t    | -    | -   |
| 1489 | 1487 | $\beta$ -Selinene                    | 0.2  | 0.1  | -    | -   |
| 1493 | 1490 | <i>trans</i> -Muurolo-4(14),5-diene  | t    | -    | -    | -   |
| 1498 | 1494 | $\alpha$ -Selinene                   | 0.1  | -    | -    | -   |
| 1501 | 1496 | $\alpha$ -Muurolo-4(14),5-diene      | t    | t    | -    | -   |
| 1503 | 1501 | $\beta$ -Dihydroagarofuran           | 0.1  | -    | -    | -   |
| 1506 | 1503 | $\beta$ -Cadinene                    | -    | -    | t    | -   |
| 1508 | 1504 | Germacrene A                         | t    | t    | -    | -   |
| 1513 | 1509 | $\gamma$ -Cadinene                   | 0.7  | 0.7  | 0.7  | 0.1 |
| 1514 | 1511 | Cubebol                              | -    | t    | -    | t   |
| 1516 | 1516 | $\delta$ -Cadinene                   | 0.1  | -    | t    | t   |
| 1519 | 1519 | Guaiacyl acetone                     | t    | 0.1  | -    | 0.2 |
| 1528 | 1524 | ( <i>E</i> )- $\gamma$ -Bisabolene   | -    | -    | -    | t   |
| 1531 | 1529 | ( <i>Z</i> )-Nerolidol               | -    | -    | -    | t   |
| 1533 | 1533 | 10- <i>epi</i> -Cubenol              | -    | -    | 0.1  | -   |
| 1537 | 1535 | $\alpha$ -Cadinene                   | t    | t    | t    | -   |
| 1544 | 1539 | $\alpha$ -Calacorene                 | t    | -    | -    | -   |
| 1548 | 1548 | $\alpha$ -Elemol                     | 53.1 | 29.5 | 1.9  | 1.2 |
| 1553 | 1553 | Geranyl butyrate                     | -    | 0.1  | t    | -   |
| 1558 | 1557 | Germacrene B                         | -    | t    | t    | -   |

|      |      |                                                   |      |     |     |     |
|------|------|---------------------------------------------------|------|-----|-----|-----|
| 1574 | 1574 | Germacrene D-4-ol                                 | -    | 0.1 | -   | -   |
| 1582 | 1577 | Caryophyllene oxide                               | 0.1  | 0.2 | 0.3 | t   |
| 1592 | 1592 | Viridiflorol                                      | -    | 0.3 | t   | t   |
| 1600 | 1594 | Guaiol                                            | t    | -   | -   | -   |
| 1607 | 1604 | 5- <i>epi</i> -7- <i>epi</i> - $\alpha$ -Eudesmol | 0.3  | 0.4 | -   | -   |
| 1608 | 1608 | Humulene epoxide II                               | -    | -   | t   | -   |
| 1610 | 1611 | Sesquilavandulol                                  | 0.4  | 0.2 | t   | -   |
| 1618 | 1613 | 1,10-di- <i>epi</i> -Cubenol                      | t    | 0.1 | t   | t   |
| 1621 | 1621 | 10- <i>epi</i> - $\gamma$ -Eudesmol               | 0.6  | 0.3 | -   | -   |
| 1627 | 1626 | 1- <i>epi</i> -Cubenol                            | -    | 0.1 | -   | -   |
| 1629 | 1628 | Eremoligenol                                      | 0.6  | 0.3 | -   | -   |
| 1630 | 1630 | $\gamma$ -Eudesmol                                | 7.5  | 2.0 | 0.1 | t   |
| 1640 | 1638 | Hinesol                                           | 0.3  | 0.2 | -   | -   |
| 1642 | 1640 | $\alpha$ -Muurolol                                | -    | 0.1 | -   | -   |
| 1643 | 1642 | <i>epi</i> - $\alpha$ -Muurolol                   | -    | 0.1 | -   | -   |
| 1647 | 1644 | $\delta$ -Cadinol                                 | -    | 0.1 | -   | -   |
| 1649 | 1647 | $\beta$ -Eudesmol                                 | 0.1  | 0.1 | 0.2 | t   |
| 1652 | 1659 | $\alpha$ -Eudesmol                                | 18.9 | 5.3 | -   | -   |
| 1658 | 1660 | Selin-11-en-4 $\alpha$ -ol                        | 0.4  | 0.6 | -   | -   |
| 1662 | 1661 | 7- <i>epi</i> - $\alpha$ -Eudesmol                | 0.1  | 0.1 | -   | -   |
| 1666 | 1663 | 14-Hydroxy- <i>epi</i> -(Z)-caryophyllene         | -    | -   | -   | 0.1 |
| 1667 | 1667 | Intermedeol                                       | -    | 0.1 | -   | -   |
| 1670 | 1672 | Bulnesol                                          | 0.1  | t   | -   | -   |
| 1672 | 1673 | <i>iso</i> -Bulnesol                              | t    | -   | -   | -   |
| 1678 | 1679 | <i>iso</i> -Hedycariol                            | t    | -   | -   | -   |
| 1688 | 1683 | 2,3-Dihydro farnesol                              | 0.1  | 0.1 | -   | -   |
| 1700 | 1696 | Eudesm-7(11)-en-4-ol                              | t    | -   | -   | -   |
| 1713 | 1706 | (2 <i>E</i> ,6 <i>Z</i> )-Farnesal                | 0.2  | 0.1 | t   | -   |
| 1714 | 1714 | Pentadecanal                                      | t    | -   | -   | -   |
| 1740 | 1734 | (2 <i>E</i> ,6 <i>E</i> )-Farnesal                | 0.3  | 0.2 | t   | -   |
| 1792 | 1789 | 8 $\alpha$ -Acetoxylemol                          | t    | 0.1 | -   | -   |
| 1798 | 1793 | <i>epi</i> -Cryptomeridiol                        | 0.1  | t   | -   | -   |
| 1813 | 1814 | Cryptomeridiol                                    | 0.2  | 0.1 | -   | -   |
| 1832 | 1832 | Neophytadiene                                     | -    | -   | 0.1 | -   |
| 2001 | 1997 | Citriodiol acetal                                 | t    | -   | -   | -   |
| 2683 | 2693 | Dehydrodisoeugenol                                | t    | 0.3 | -   | 0.2 |

RI<sub>calc</sub>: retention index determined with respect to a homologous series of n-alkanes on a ZB-5 ms column and RI<sub>db</sub>: retention indices from the databases [1,2]. "t" indicates trace ( $\leq 0.05\%$ ) and "-" indicates not detected.

Table S2: Chemical composition of *Cymbopogon citratus* essential oil extracted from roots and leaves

| RI <sub>db</sub> | RI <sub>calc</sub> | compounds                                            | Lemongrass |        |
|------------------|--------------------|------------------------------------------------------|------------|--------|
|                  |                    |                                                      | Root       | Leaves |
| 982              | 981                | 6-Methyl-5-hepten-2-one                              | 0.4        | 0.2    |
| 991              | 989                | 6-Methyl-5-hepten-2-ol                               | t          | -      |
| 1002             | 998                | n-Octanal                                            | -          | t      |
| 1027             | 1024               | Limonene                                             | -          | t      |
| 1031             | 1026               | 1,8-Cineole                                          | -          | 0.1    |
| 1033             | 1032               | (Z)- $\beta$ -Ocimene                                | t          | t      |
| 1044             | 1044               | (E)- $\beta$ -Ocimene                                | t          | t      |
| 1051             | 1051               | Bergamal                                             | -          | t      |
| 1069             | 1068               | 4-Nonanone                                           | 0.1        | 0.1    |
| 1092             | 1090               | Rosefuran                                            | t          | 0.1    |
| 1098             | 1095               | Linalool                                             | 0.5        | 0.6    |
| 1120             | 1119               | <i>trans-p</i> -Mentha-2,8-dien-1-ol                 | t          | -      |
| 1135             | 1136               | <i>cis-p</i> -Mentha-2,8-dien-1-ol                   | t          | -      |
| 1136             | 1137               | <i>epi</i> -Photocitral A                            | -          | 0.1    |
| 1142             | 1140               | exo-Isocitral                                        | t          | 0.1    |
| 1145             | 1145               | Isopulegol                                           | t          | -      |
| 1148             | 1147               | <i>trans</i> -Chrysanthanal                          | -          | 0.2    |
| 1151             | 1148               | Citronellal                                          | 0.1        | 0.1    |
| 1160             | 1160               | <i>cis</i> -Chrysanthanol                            | 0.1        | 0.2    |
| 1168             | 1165               | Rosefuran epoxide                                    | t          | 0.2    |
| 1170             | 1166               | <i>p</i> -Mentha-1,5-dien-8-ol                       | 0.1        | -      |
| 1178             | 1177               | <i>trans</i> -Isocitral                              | 0.4        | 0.4    |
| 1181             | 1180               | Anethofuran                                          | 0.1        | -      |
| 1195             | 1199               | $\alpha$ -Terpineol                                  | t          | -      |
| 1205             | 1200               | $\beta$ -Cyclocitral                                 | 0.1        | -      |
| 1206             | 1201               | n-Decanal                                            | -          | 0.2    |
| 1216             | 1216               | <i>trans</i> -Isopiperitenol                         | t          | -      |
| 1219             | 1218               | Epoxy neral                                          | t          | 0.1    |
| 1222             | 1223               | Citronellol                                          | 0.3        | -      |
| 1223             | 1227               | Nerol                                                | 0.1        | t      |
| 1230             | 1232               | Epoxy geranial                                       | 0.1        | 0.1    |
| 1238             | 1235               | Neral                                                | 16.6       | 36.1   |
| 1250             | 1249               | Geraniol                                             | 0.4        | 0.3    |
| 1253             | 1250               | Piperitone                                           | -          | t      |
| 1268             | 1264               | Geranial                                             | 25.0       | 53.1   |
| 1280             | 1273               | <i>trans</i> -Carvone oxide                          | t          | 0.4    |
| 1308             | 1309               | <i>p</i> -Vinyl guaiacol                             | t          | -      |
| 1312             | 1309               | Methyl geranate                                      | 0.1        | 0.1    |
| 1353             | 1358               | Neric acid                                           | 0.3        | 0.6    |
| 1360             | 1360               | (5 <i>E</i> )-2,4,4,7-Tetramethyl octa-5,7-dien-3-ol | -          | 0.1    |

|      |      |                                                    |      |     |
|------|------|----------------------------------------------------|------|-----|
| 1367 | 1373 | $\alpha$ -Ylangene                                 | -    | t   |
| 1376 | 1379 | Geranyl acetate                                    | t    | t   |
| 1379 | 1382 | <i>cis</i> - $\beta$ -Elemene                      | t    | -   |
| 1387 | 1389 | <i>trans</i> - $\beta$ -Elemene                    | 1.4  | 0.1 |
| 1408 | 1408 | Dodecanal                                          | -    | t   |
| 1417 | 1417 | ( <i>E</i> )- $\beta$ -Caryophyllene               | 0.2  | 1.0 |
| 1444 | 1448 | ( <i>E</i> )-Isoeugenol                            | 0.6  | 0.4 |
| 1453 | 1452 | $\alpha$ -Humulene                                 | t    | 0.1 |
| 1474 | 1475 | Selina-4,11-diene                                  | t    | -   |
| 1476 | 1475 | ( <i>E</i> )-beta-Ionone                           | -    | t   |
| 1478 | 1475 | $\gamma$ -Gurjunene                                | t    | -   |
| 1480 | 1484 | Germacrene D                                       | -    | 0.1 |
| 1487 | 1489 | $\beta$ -Selinene                                  | 0.1  | -   |
| 1504 | 1504 | Cuparene                                           | 0.1  | -   |
| 1509 | 1513 | $\gamma$ -Cadinene                                 | 0.3  | 0.8 |
| 1511 | 1514 | Cubebol                                            | -    | t   |
| 1516 | 1516 | $\delta$ -Cadinene                                 | -    | t   |
| 1519 | 1519 | Guaiacyl acetone                                   | t    | 0.1 |
| 1524 | 1528 | ( <i>E</i> )- $\gamma$ -Bisabolene                 | 0.2  | 0.1 |
| 1532 | 1532 | $\gamma$ -Cuprenene                                | t    | -   |
| 1533 | 1533 | 10- <i>epi</i> -Cubenol                            | -    | 0.1 |
| 1548 | 1548 | $\alpha$ -Elemol                                   | 31.5 | 0.3 |
| 1577 | 1582 | Caryophyllene oxide                                | t    | 1.3 |
| 1592 | 1592 | Viridiflorol                                       | -    | t   |
| 1604 | 1607 | 5- <i>epi</i> -7- <i>epi</i> - $\alpha$ -Eudesmol  | 0.1  | -   |
| 1608 | 1608 | Humulene epoxide II                                | -    | 0.1 |
| 1613 | 1618 | 1,10-di- <i>epi</i> -Cubenol                       | -    | t   |
| 1621 | 1621 | 10- <i>epi</i> - $\gamma$ -Eudesmol                | 0.3  | -   |
| 1630 | 1630 | $\gamma$ -Eudesmol                                 | 5.2  | t   |
| 1638 | 1640 | Hinesol                                            | 0.2  | -   |
| 1641 | 1641 | Valerianol                                         | t    | -   |
| 1642 | 1644 | <i>epi</i> - $\alpha$ -Muurolol                    | -    | t   |
| 1647 | 1649 | $\beta$ -Eudesmol                                  | 0.1  | 0.1 |
| 1659 | 1652 | $\alpha$ -Eudesmol                                 | 11.3 | -   |
| 1661 | 1662 | 7- <i>epi</i> - $\alpha$ -Eudesmol                 | 0.1  | -   |
| 1663 | 1666 | 14-Hydroxy- <i>epi</i> -( <i>Z</i> )-caryophyllene | 1.0  | 0.1 |
| 1668 | 1669 | Isospathulenol                                     | 0.1  | -   |
| 1683 | 1683 | $\alpha$ -Bisabolol                                | 0.1  | -   |
| 1706 | 1713 | (2 <i>E</i> ,6 <i>Z</i> )-Farnesal                 | 0.3  | 0.1 |
| 1713 | 1714 | (2 <i>E</i> ,6 <i>Z</i> )-Farnesol                 | -    | -   |
| 1734 | 1740 | (2 <i>E</i> ,6 <i>E</i> )-Farnesal                 | 0.5  | t   |
| 1771 | 1770 | 8- $\alpha$ -Acetoxy elemol                        | 0.1  | -   |
| 1775 | 1773 | <i>epi</i> -Cryptomeridiol                         | 0.1  | -   |
| 1814 | 1814 | Cryptomeridiol                                     | 0.3  | -   |

|      |      |                    |     |     |
|------|------|--------------------|-----|-----|
| 1832 | 1832 | Neophytadiene      | -   | 0.5 |
| 2693 | 2683 | Dehydrodisoeugenol | 0.2 | -   |

RI<sub>calc</sub>: retention index determined with respect to a homologous series of n-alkanes on a ZB-5 ms column and RI<sub>db</sub>: retention indices from the databases [1,2]. "t" indicates trace (≤0.05%) and "-" indicates not detected.

**Table S3: Chemical composition of *Cymbopogon martini* essential oils extracted from roots and leaves**

| RI <sub>db</sub> | RI <sub>calc</sub> | Compounds                       | Palmarosa |      |
|------------------|--------------------|---------------------------------|-----------|------|
|                  |                    |                                 | Root      | Leaf |
| 759              | 762                | Pentanol                        | t         | t    |
| 848              | 850                | (3Z)-Hexenol                    | -         | 0.1  |
| 859              | 854                | (2E)-Hexenol                    | -         | t    |
| 862              | 863                | n-Hexanol                       | -         | t    |
| 871              | 869                | Isopentyl acetate               | -         | t    |
| 901              | 899                | 3-Methyl cyclopentyl acetate    | -         | t    |
| 982              | 981                | 6-Methyl-5-hepten-2-one         | -         | t    |
| 987              | 988                | Myrcene                         | 0.1       | 0.2  |
| 1027             | 1024               | Limonene                        | t         | t    |
| 1031             | 1026               | 1,8-Cineole                     | -         | t    |
| 1033             | 1032               | (Z)-β-Ocimene                   | t         | 0.2  |
| 1044             | 1044               | (E)-β-Ocimene                   | 0.2       | 0.9  |
| 1049             | 1048               | 2,6-Dimethyl-2,6-octadiene      | -         | t    |
| 1051             | 1051               | Bergamot                        | -         | t    |
| 1059             | 1059               | Acetophenone                    | t         | -    |
| 1068             | 1067               | cis-Linalool oxide (furanoid)   | -         | t    |
| 1070             | 1069               | n-Octanol                       | t         | t    |
| 1083             | 1085               | p-Mentha-2,4(8)-diene           | -         | t    |
| 1087             | 1086               | trans-Linalool oxide (furanoid) | -         | t    |
| 1092             | 1090               | Rosefuran                       | -         | t    |
| 1093             | 1092               | α-Pinene epoxide                | -         | t    |
| 1098             | 1095               | Linalool                        | 3.2       | 2.0  |
| 1127             | 1128               | allo-Ocimene                    | -         | t    |
| 1164             | 1167               | Octanoic acid                   | t         | -    |
| 1195             | 1199               | α-Terpineol                     | t         | t    |
| 1219             | 1218               | Epoxy neral                     | -         | t    |
| 1223             | 1227               | Nerol                           | t         | 0.1  |
| 1230             | 1232               | Epoxy geranial                  | -         | t    |
| 1238             | 1235               | Neral                           | t         | 0.2  |
| 1250             | 1249               | Geraniol                        | 87.9      | 76.6 |
| 1268             | 1264               | Geranial                        | 0.2       | 0.6  |
| 1296             | 1298               | Geranyl formate                 | t         | t    |
| 1331             | 1330               | 2,3-Dihydro-2,3-epoxy-Geraniol  | t         | t    |
| 1353             | 1358               | Neric acid                      | t         | -    |

|      |      |                             |     |      |
|------|------|-----------------------------|-----|------|
| 1376 | 1379 | Geranyl acetate             | 4.4 | 15.2 |
| 1387 | 1389 | trans- $\beta$ -Elemene     | t   | t    |
| 1417 | 1417 | (E)- $\beta$ -Caryophyllene | 0.4 | 0.5  |
| 1445 | 1444 | Geranyl acetone             | t   | -    |
| 1450 | 1451 | (E)- $\beta$ -Farnesene     | t   | t    |
| 1453 | 1452 | $\alpha$ -Humulene          | t   | t    |
| 1468 | 1474 | Geranyl propionate          | -   | t    |
| 1474 | 1475 | Selina-4,11-diene           | t   | -    |
| 1476 | 1487 | (E)-beta-Ionone             | -   | t    |
| 1487 | 1489 | $\beta$ -Selinene           | t   | t    |
| 1493 | 1496 | Valencene                   | -   | t    |
| 1502 | 1505 | (E,E)- $\alpha$ -Farnesene  | t   | t    |
| 1520 | 1520 | 7-epi- $\alpha$ -Selinene   | t   | t    |
| 1548 | 1548 | $\alpha$ -Elemol            | t   | t    |
| 1553 | 1557 | Geranyl butanoate           | t   | 0.2  |
| 1559 | 1561 | (E)-Nerolidol               | 0.1 | 0.1  |
| 1577 | 1582 | Caryophyllene oxide         | t   | 0.1  |
| 1596 | 1606 | Geranyl isovalerate         | t   | t    |
| 1611 | 1611 | Tetradecanal                | t   | -    |
| 1652 | 1648 | Ageratochromene             | t   | -    |
| 1653 | 1651 | Pogostol                    | -   | t    |
| 1660 | 1658 | Selin-11-en-4- $\alpha$ -ol | -   | t    |
| 1671 | 1671 | n-Tetradecanol              | t   | -    |
| 1713 | 1714 | (2E,6Z)-Farnesol            | 3.0 | 1.3  |
| 1734 | 1740 | (2E,6E)-Farnesal            | t   | t    |
| 1749 | 1752 | Geranyl heptanoate          | 0.1 | 1.0  |
| 1830 | 1821 | Farnesyl acetate            | t   | 0.1  |
| 1832 | 1832 | Neophytadiene               | -   | t    |
| 1839 | 1838 | Phytone                     | t   | -    |
| 1941 | 1943 | Geranyl octanoate           | t   | 0.2  |
| 2698 | 2700 | Heptacosane                 | t   | -    |

RI<sub>calc</sub>: retention index determined with respect to a homologous series of n-alkanes on a ZB-5 ms column and RI<sub>db</sub>: retention indices from the databases [1,2]. "t" indicates trace ( $\leq 0.05\%$ ) and "-" indicates not detected.

## References

1. Satyal, P. Development of GC-MS Database of Essential Oil Components by the Analysis of Natural Essential Oils and Synthetic Compounds and Discovery of Biologically Active Novel Chemotypes in Essential Oils, 2015.
2. Adams, R.P. *Identification of Essential Oil Components by Gas Chromatography/Mass Spectrometry*; 4th ed.; Allured Publishing: Carol Stream, IL, USA, 2007.
